# Supplementary material for: Comparative analysis of cell lineage differentiation during hepatogenesis in humans and mice at the single-cell transcriptome level
Source: PubMed Central journal article supplement (PMC7784864; doi:10.1038/s41422-020-0378-6), 2020-07-20
Supplement: 41422_2020_378_MOESM1_ESM.pdf [file 41422_2020_378_MOESM1_ESM.pdf]

Wang/Xu Figure S1

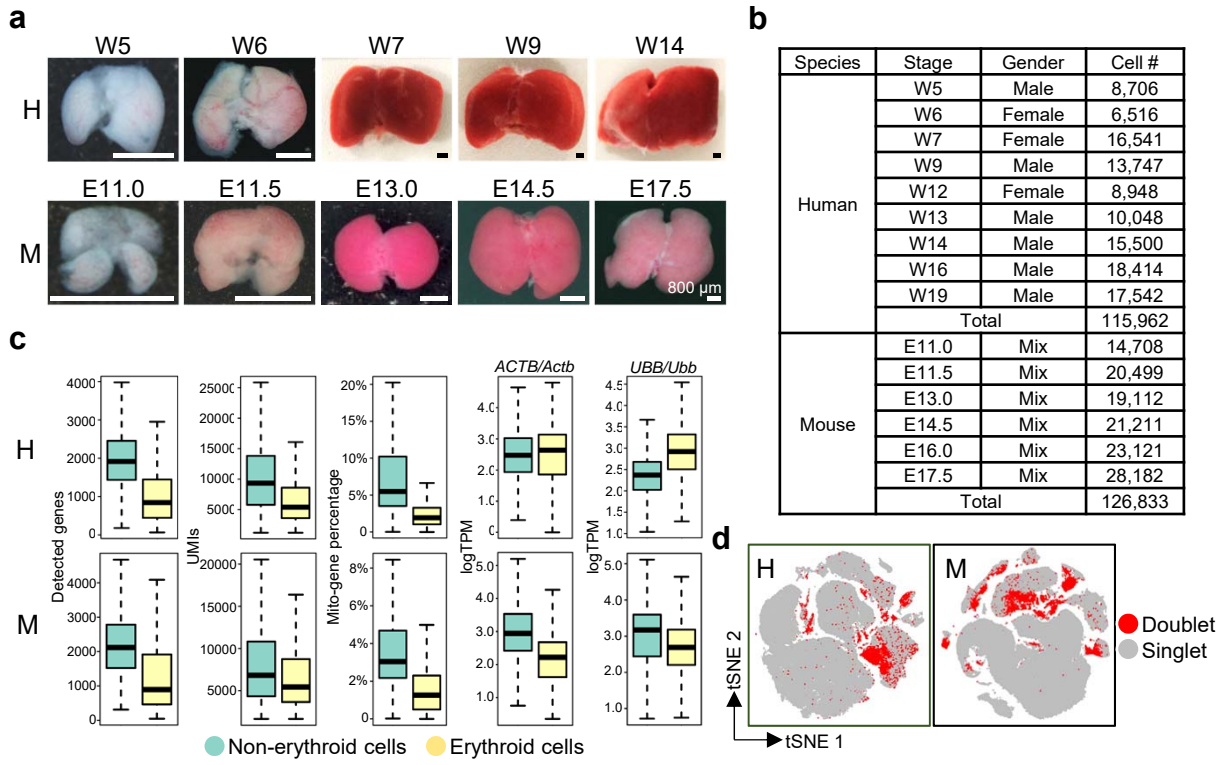

**Supplementary information, Fig. S1 Quality control for scRNA-seq of human and mouse fetal livers. a** Images of human (H) and mouse (M) fetal livers. Scale bars, 800  $\mu\text{m}$ . **b** The sample list, including species, stage, gender, and captured cell number. **c** Boxplots showing detected genes, UMIs, mitochondrial-gene percentage and the expression of housekeeping genes *ACTB/Actb* and *UBB/Ubb* in human (upper) and mouse (lower) non-erythroid cells and erythrocytes. **d** t-SNE plots showing doublet distribution in 10 $\times$  Genomics data from human (H) and mouse (M) fetal livers.
