# Supplementary material for: Comparative analysis of cell lineage differentiation during hepatogenesis in humans and mice at the single-cell transcriptome level
Source: PubMed Central journal article supplement (PMC7784864; doi:10.1038/s41422-020-0378-6), 2020-07-20
Supplement: 41422_2020_378_MOESM3_ESM.pdf [file 41422_2020_378_MOESM3_ESM.pdf]

Wang/Xu Figure S3

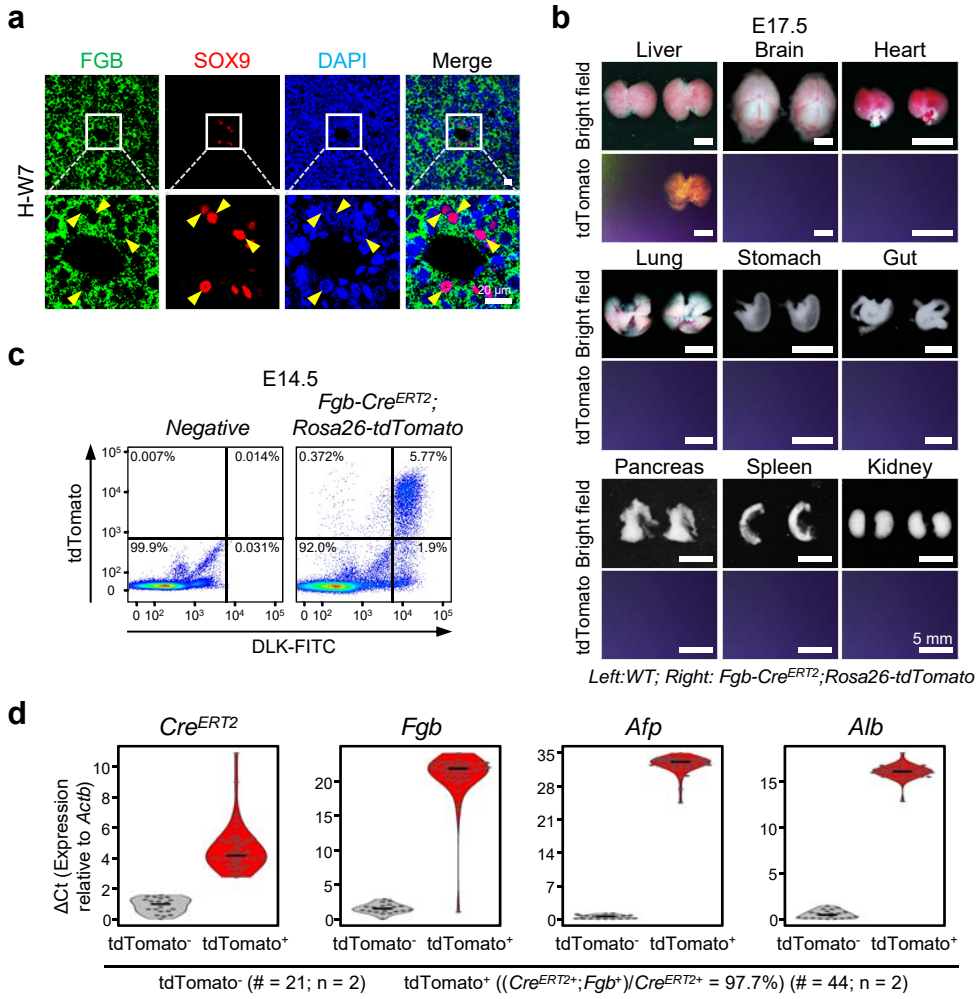

**Supplementary information, Fig. S3 Examination of labeling efficiency of *Fgb-Cre<sup>ERT2</sup>* transgenic mice.** **a** Immunofluorescence showing the expression and distribution of FGB and SOX9 in the W7 human (H-W7) fetal liver. The yellow arrowhead indicates FGB<sup>+</sup>SOX9<sup>+</sup> cholangiocytes. Scale bars, 20  $\mu$ m. **b** Morphologies and tdTomato signals in several major organs of E17.5 *WT* and *Fgb-Cre<sup>ERT2</sup>;Rosa26-tdTomato* mice. Scale bars, 5 mm. **c** FACS gating of tdTomato<sup>-</sup> and tdTomato<sup>+</sup> cells in E14.5 *WT* and *Fgb-Cre<sup>ERT2</sup>;Rosa26-tdTomato* mice. **d** Violin plots showing the expression levels of *Cre<sup>ERT2</sup>*, *Fgb*, *Alb*, and *Afp* in tdTomato<sup>-</sup> and tdTomato<sup>+</sup> cells from E14.5 *Fgb-Cre<sup>ERT2</sup>;Rosa26-tdTomato* mice quantified by single-cell RT-qPCR. Each dot represents a single cell. #, number of single cells. n, number of embryos.
