# Supplementary material for: Comparative analysis of cell lineage differentiation during hepatogenesis in humans and mice at the single-cell transcriptome level
Source: PubMed Central journal article supplement (PMC7784864; doi:10.1038/s41422-020-0378-6), 2020-07-20
Supplement: 41422_2020_378_MOESM4_ESM.pdf [file 41422_2020_378_MOESM4_ESM.pdf]

Wang/Xu Figure S4

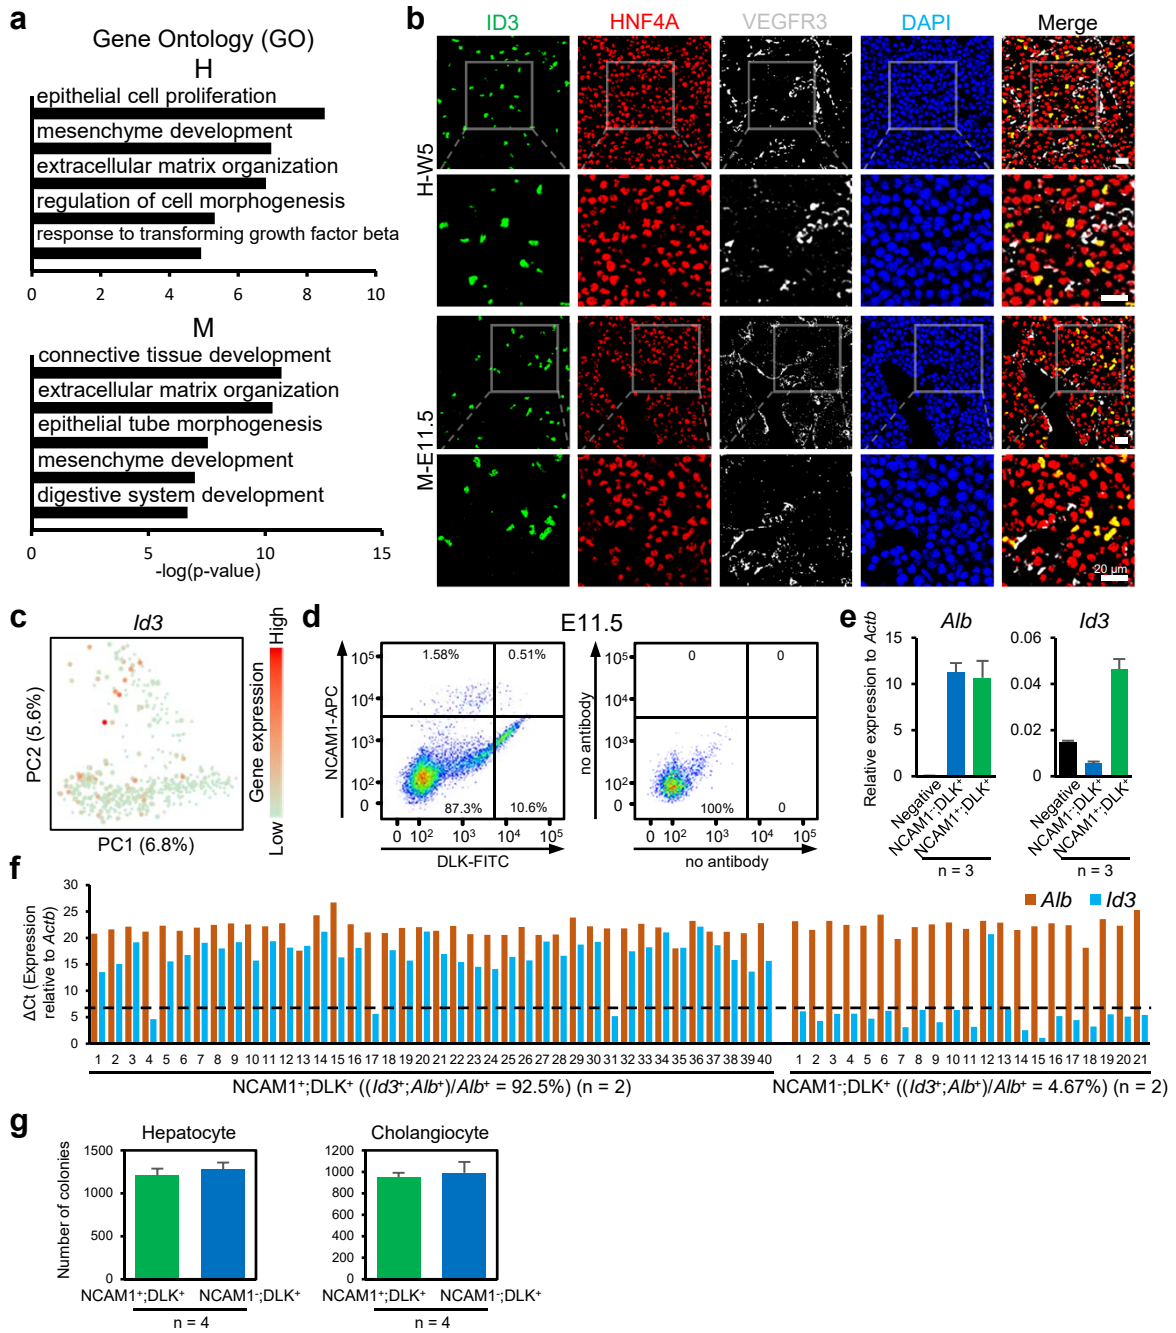

**Supplementary information, Fig. S4 Identification and functional verification of ID3<sup>+</sup> hepatoblasts.** **a** GO analysis of genes highly expressed in human (H) and mouse (M) ID3<sup>+</sup> hepatoblasts. **b** Immunofluorescence showing the expression and distribution of ID3 and HNF4A in the W5 human (H-W5) and E11.5 mouse (M-E11.5) fetal liver. VEGFR3 marks vessels. Scale bars, 20  $\mu$ m. **c** PCA plot showing *Id3* expression in a previous mouse hepatoblast differentiation Smart-seq2 dataset.<sup>5</sup> **d** FACS gating showing the expression and distribution of NCAM1 and DLK on E11.5 mouse liver cells. **e** RT-qPCR analysis showing the expression of marker genes *Alb* and *Id3* in cells from each cluster of E11.5 mouse liver. n: number of embryos. **f** Single-cell RT-qPCR analysis estimating the percentage of *Id3*<sup>+</sup> hepatoblasts in NCAM1<sup>+</sup>DLK<sup>+</sup> and NCAM1<sup>-</sup>DLK<sup>+</sup> cells. The dashed line indicates the threshold of *Id3* expression. n: number of embryos. **g** Statistical analysis showing the number of colonies of the cultured hepatocytes (6-day culture) and cholangiocytes (10-day culture). n, number of biological replicates.
