# Supplementary material for: Comparative analysis of cell lineage differentiation during hepatogenesis in humans and mice at the single-cell transcriptome level
Source: PubMed Central journal article supplement (PMC7784864; doi:10.1038/s41422-020-0378-6), 2020-07-20
Supplement: 41422_2020_378_MOESM6_ESM.pdf [file 41422_2020_378_MOESM6_ESM.pdf]

# Wang/Xu Figure S6

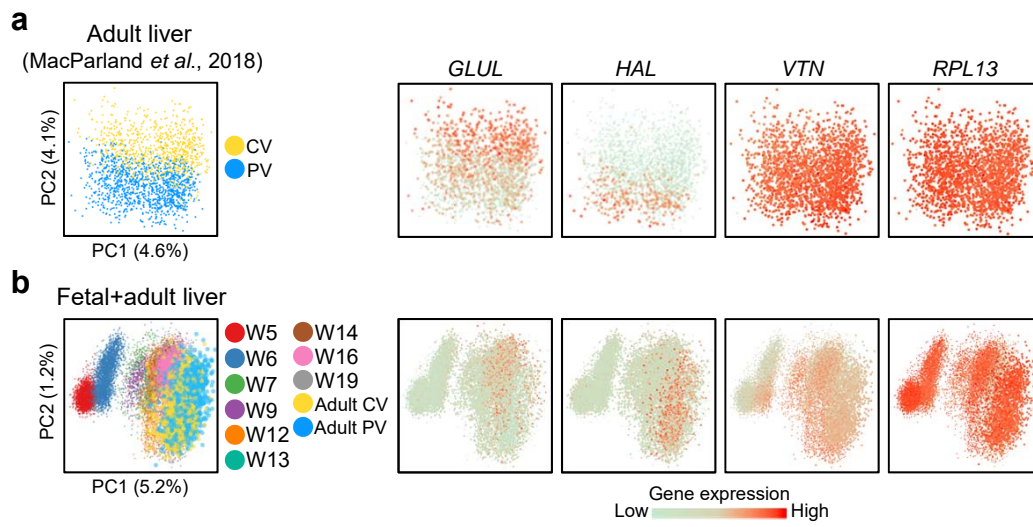

**Supplementary information, Fig. S6 Analysis of heterogeneity of human hepatocytes.** **a** PCA plots showing zonation and zonation-related genes in previously described adult human hepatocytes.<sup>2</sup> **b** Projection of adult human hepatocytes onto the PCA plot of human quiescent hepatoblasts/hepatocytes.
