# Supplementary material for: Comparative analysis of cell lineage differentiation during hepatogenesis in humans and mice at the single-cell transcriptome level
Source: PubMed Central journal article supplement (PMC7784864; doi:10.1038/s41422-020-0378-6), 2020-07-20
Supplement: 41422_2020_378_MOESM7_ESM.pdf [file 41422_2020_378_MOESM7_ESM.pdf]

Wang/Xu Figure S7

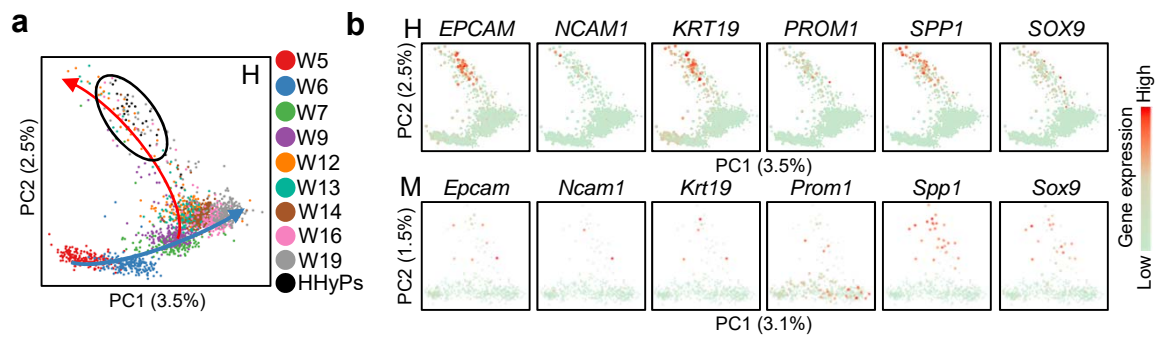

**Supplementary information, Fig. S7 Analysis of HHyPs in the human hepatoblast differentiation pathway. a** Projection of human HHyPs (black circle) onto the developmental pathway of human hepatoblasts. Arrows indicate the directions of hepatocyte (blue) and cholangiocyte (red) differentiation. **b** PCA plots showing the expression levels of HHyP-related markers in human (H) hepatobiliary cells, HHyPs, and mouse (M) hepatobiliary cells.
