# Supplementary material for: Comparative analysis of cell lineage differentiation during hepatogenesis in humans and mice at the single-cell transcriptome level
Source: PubMed Central journal article supplement (PMC7784864; doi:10.1038/s41422-020-0378-6), 2020-07-20
Supplement: 41422_2020_378_MOESM8_ESM.pdf [file 41422_2020_378_MOESM8_ESM.pdf]

Wang/Xu Figure S8

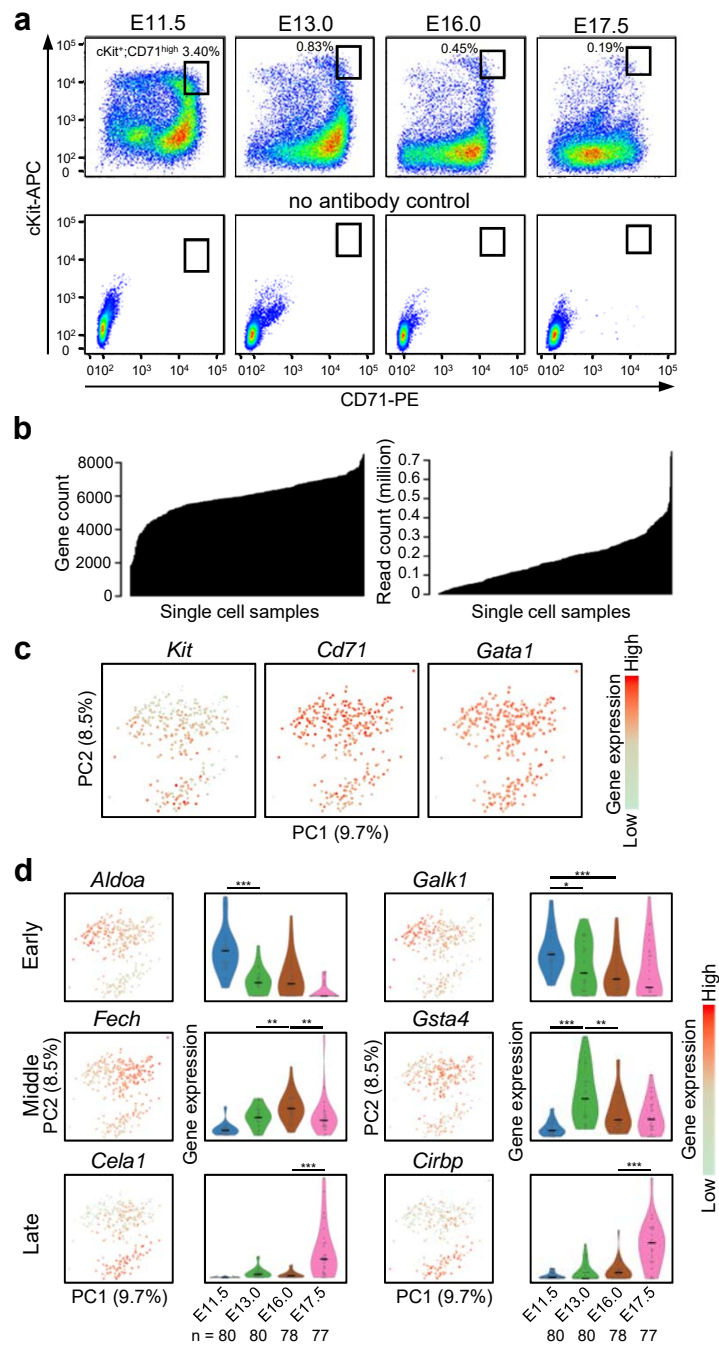

**Supplementary information, Fig. S8 Isolation of mouse erythroid progenitors from fetal livers.** **a** FACS plots showing the gating of cKit<sup>+</sup>CD71<sup>high</sup> cells in E11.5-17.5 mouse whole blood cells. **b** Bar plots showing detected genes (left) and read counts (right) for mSTRT-seq data from mouse cKit<sup>+</sup>CD71<sup>high</sup> cells. **c** PCA plots showing the expression levels of marker genes of erythroid progenitors in mouse cKit<sup>+</sup>CD71<sup>high</sup> cells. **d** PCA plots showing the expression levels of marker genes in mouse cKit<sup>+</sup>CD71<sup>high</sup> cells. Violin plots showing the expression levels of marker genes of E11.5-17.5 mouse cKit<sup>+</sup>CD71<sup>high</sup> cells validated by single-cell RT-qPCR. The y-axis represents the relative expression values normalized to *Gapdh* expression. Each dot represents a single cell. The black line within each violin plot indicates the median of the expression levels. n, number of single cells. \**P* < 0.05; \*\**P* < 0.01; \*\*\**P* < 0.001, Wilcoxon test.
